# Supplementary material for: Tunable transition from hydration to monomer-supported lubrication in zwitterionic monolayers revealed by molecular dynamics simulation
Source: Royal Society of Chemistry journal article supplement (doi:10.1039/c4sm02883j), 2015-01-01
Supplement: c4sm02883j1.pdf [file c4sm02883j1.pdf]

**Supporting information for:**

**"Tunable Transition from Hydration to**

**Monomer-Supported Lubrication in Zwitterionic**

**Monolayers Revealed by Molecular Dynamics**

**Simulation"**

Christoph Klein,<sup>†,‡</sup> Christopher R. Iacovella,<sup>†,‡</sup> Clare McCabe,<sup>†,‡,¶</sup> and Peter T.  
Cummings<sup>\*,†,‡</sup>

*Department of Chemical and Biomolecular Engineering, Vanderbilt University, Nashville,  
Tennessee 37235, United States, Vanderbilt Multiscale Modeling and Simulation (MuMS) Center,  
Vanderbilt University, Nashville, Tennessee 37235, USA, and Department of Chemistry,  
Vanderbilt University, Nashville, Tennessee 37235, United States*

E-mail: peter.cummings@vanderbilt.edu

---

\*To whom correspondence should be addressed

<sup>†</sup>Department of Chemical and Biomolecular Engineering, Vanderbilt University, Nashville, Tennessee 37235, United States

<sup>‡</sup>Vanderbilt Multiscale Modeling and Simulation (MuMS) Center, Vanderbilt University, Nashville, Tennessee 37235, USA

<sup>¶</sup>Department of Chemistry, Vanderbilt University, Nashville, Tennessee 37235, United States

Table S1: Summary of partial charges. Corresponding .xyz file for a monomer given below.

| Name | q (e) |
|------|-------|
| HC3  | 0.15  |
| N3   | 0.30  |
| CH3  | -0.31 |
| CT   | -0.13 |
| HC   | 0.06  |
| CTD  | 0.41  |
| HCD  | -0.01 |
| OSD  | -0.61 |
| P    | 1.42  |
| O2D  | -1.03 |
| CTE  | 0.27  |
| OS   | -0.61 |
| C    | 0.99  |
| O    | -0.69 |
| CM3  | -0.13 |
| CM1  | -0.30 |
| HM   | 0.16  |
| CH2  | -0.26 |
| OH   | -0.88 |
| HO   | 0.44  |
| Si2  | 1.29  |

# Listing S1: .xyz file for a single monomer

45

Silane MPC

|     |          |          |          |
|-----|----------|----------|----------|
| Si2 | -0.04172 | -2.90982 | 0.22037  |
| OH  | -1.24454 | -2.87736 | 0.00477  |
| OH  | 1.10628  | -3.12501 | -0.13071 |
| HO  | -2.28453 | -2.69327 | 0.34699  |
| HO  | 2.19471  | -3.31217 | -0.36034 |
| CH2 | 0.11586  | -2.56520 | 1.31676  |
| CM3 | 0.95504  | -2.16260 | 2.51336  |
| HC  | -0.26119 | -3.53452 | 1.71497  |
| HC  | -0.57509 | -1.71410 | 1.52665  |
| CM1 | 2.14119  | -1.54573 | 2.37393  |
| HM  | 2.55320  | -1.34557 | 1.38814  |
| HM  | 2.71388  | -1.19372 | 3.22606  |
| C   | 0.29712  | -2.37195 | 3.84703  |
| O   | -0.83193 | -2.82291 | 3.96183  |
| OS  | 1.04002  | -1.99788 | 4.91054  |
| CTE | 0.52719  | -2.24033 | 6.24686  |
| CTD | 1.60798  | -1.78750 | 7.24244  |
| HC  | 0.33306  | -3.31155 | 6.35865  |
| HC  | -0.40096 | -1.68051 | 6.39816  |
| OSD | 1.42343  | -2.42122 | 8.53518  |
| HCD | 1.60400  | -0.69923 | 7.34603  |
| HCD | 2.58140  | -2.10625 | 6.86123  |
| P   | 0.69269  | -1.67034 | 9.75920  |
| OSD | 2.24817  | -1.93833 | 10.15396 |
| O2D | -0.56520 | -2.36912 | 9.40468  |
| OSD | 0.71235  | -2.38080 | 11.20677 |
| CTD | -0.04528 | -1.85267 | 12.32707 |
| CT  | 0.90614  | -1.16063 | 13.33217 |
| HCD | -0.54102 | -2.69471 | 12.81585 |
| HCD | -0.80235 | -1.15413 | 11.96164 |
| N3  | 0.29673  | -0.57328 | 14.60028 |
| HC  | 1.42836  | -0.34232 | 12.82827 |
| HC  | 1.64632  | -1.88560 | 13.68450 |
| CH3 | 1.39046  | 0.07911  | 15.41680 |
| HC3 | 1.87522  | 0.86910  | 14.83652 |
| HC3 | 2.14672  | -0.65816 | 15.70080 |
| HC3 | 0.98398  | 0.52350  | 16.33042 |
| CH3 | -0.35135 | -1.65156 | 15.44106 |
| HC3 | -1.19803 | -2.14701 | 14.95900 |
| HC3 | -0.71483 | -1.17491 | 16.35686 |
| HC3 | 0.38362  | -2.41235 | 15.71859 |
| CH3 | -0.73911 | 0.47297  | 14.25681 |
| HC3 | -0.28687 | 1.24851  | 13.63252 |
| HC3 | -1.09334 | 0.93523  | 15.18306 |
| HC3 | -1.60419 | 0.06107  | 13.73049 |

Figure S1 summarizes the placement of chains on the substrate.

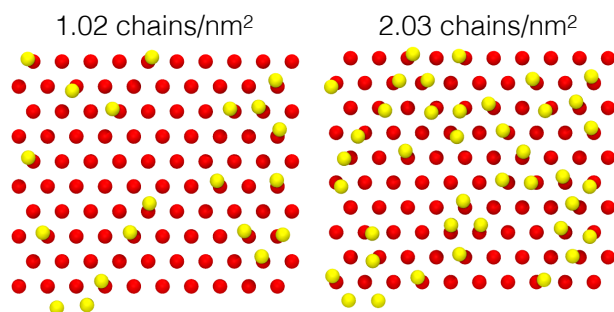

Figure S1: Binding site locations for both chain densities. Red shows available surface oxygens. Yellow shows silicon atoms at the base of bound monomers.

Figure S2 shows the hydration levels of the monolayer as a function of separation distance. These data support the trends shown in Figure 2.

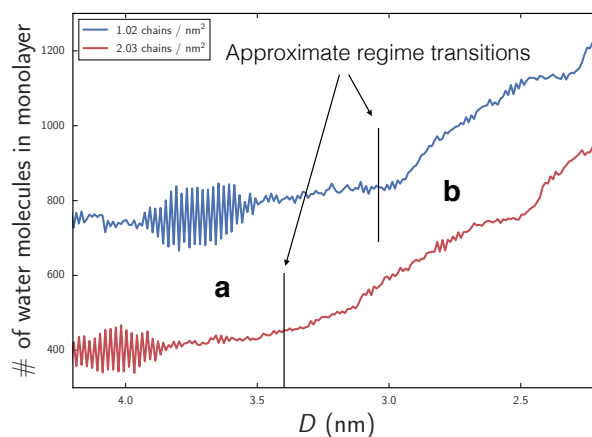

Figure S2: Amount of water trapped within the monolayers across separation distances.

Figure S3 summarizes the simulations we performed at 1 m/s shearing speeds to probe the velocity dependence of the tribology of our systems.

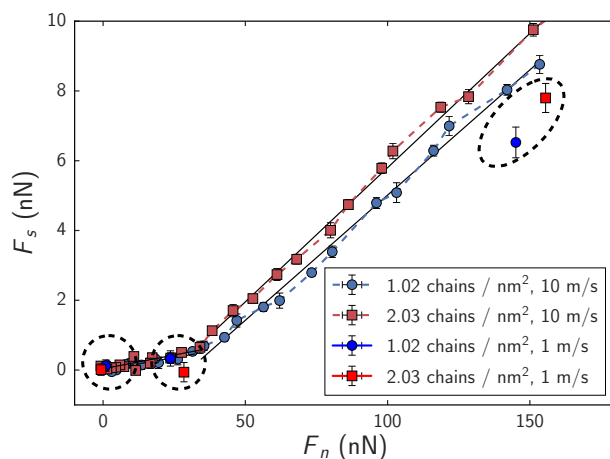

Figure S3: Velocity dependence of shear force. Data from Fig. 4 is overlaid with select runs performed at 1 m/s.

Film thickness is calculated by binning atoms in each monolayer over time according to their z-position in the system (shown in S4). The film thickness is then defined as the difference between the z-value where the cumulative distribution function reaches 0.9 and the z-value closest to the surface.

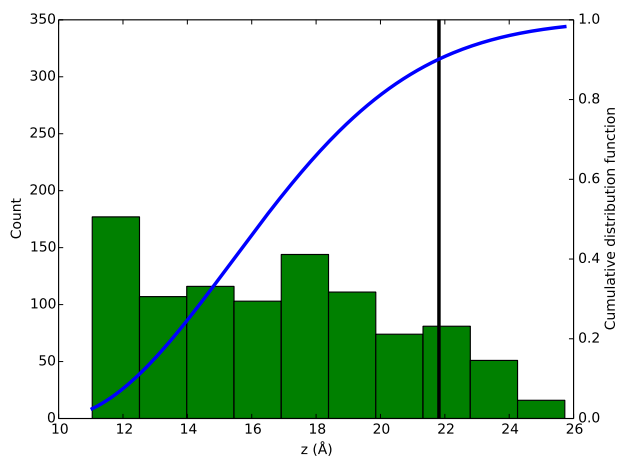

Figure S4: Example of film thickness calculation for a single frame. Green histogram shows vertical position of atoms in bottom film. Blue line denotes cumulative distribution function (CDF) of atoms in bottom film. Black vertical line denotes cutoff where CDF reaches 0.9.
